# Supplementary material
Source: publisher figshare collection journal article supplement (https://plos.figshare.com/articles/dataset/_/1631436)
Supplement: Supplementary file [file 1]

## SUPPLEMENT MATERIAL TO:

# Combining evolutionary information and an iterative sampling strategy for accurate protein structure prediction

Tatjana Braun, Julia Koehler Leman, Oliver F. Lange

## Table of Contents

|                                                                                            |           |
|--------------------------------------------------------------------------------------------|-----------|
| <b>Supporting Figures.....</b>                                                             | <b>2</b>  |
| Figure A: Computational expense for the initial RASREC run.....                            | 2         |
| Figure B: Lowest-Energy ReRASREC-PLM Structures.....                                       | 3         |
| Figure C: Comparison of ReRASREC-DI and EVFold-DI .....                                    | 4         |
| Figure D: Comparison of top-ranked ReRASREC structures and lowest-RMSD EVFold models ..... | 5         |
| Figure E: Analysis of convergence and performance .....                                    | 6         |
| Figure F: Fraction of satisfied restraints in the native and top-ranked models.....        | 7         |
| <b>Supporting Tables.....</b>                                                              | <b>8</b>  |
| Table A: TM-scores for EVFold, RASREC, PconsFold and FRAGFOLD .....                        | 8         |
| Table B: Accuracy of side-chain $\chi_1$ rotamers for EVFold-PLM and ReRASREC-PLM.....     | 9         |
| Table C: Comparison between top ranked and lowest-RMSD structures .....                    | 10        |
| Table D: Restraint classification performance of RASREC .....                              | 11        |
| <b>Supporting Methods.....</b>                                                             | <b>12</b> |
| <b>Method A: Contact Prediction and Restraint File Generation.....</b>                     | <b>12</b> |
| <b>Method B: Structure Prediction with the RASREC protocol .....</b>                       | <b>12</b> |
| Fragment Selection .....                                                                   | 12        |
| Starting a RASREC run .....                                                                | 12        |
| Flag Files, Patches and Broker File .....                                                  | 13        |
| <b>Method C: Refinement with Rasrec .....</b>                                              | <b>16</b> |
| Repick Restraints.....                                                                     | 16        |
| Setup RASREC run .....                                                                     | 16        |
| <b>References.....</b>                                                                     | <b>17</b> |

## Supporting Figures

**Figure A: Computational expense for the initial RASREC run**

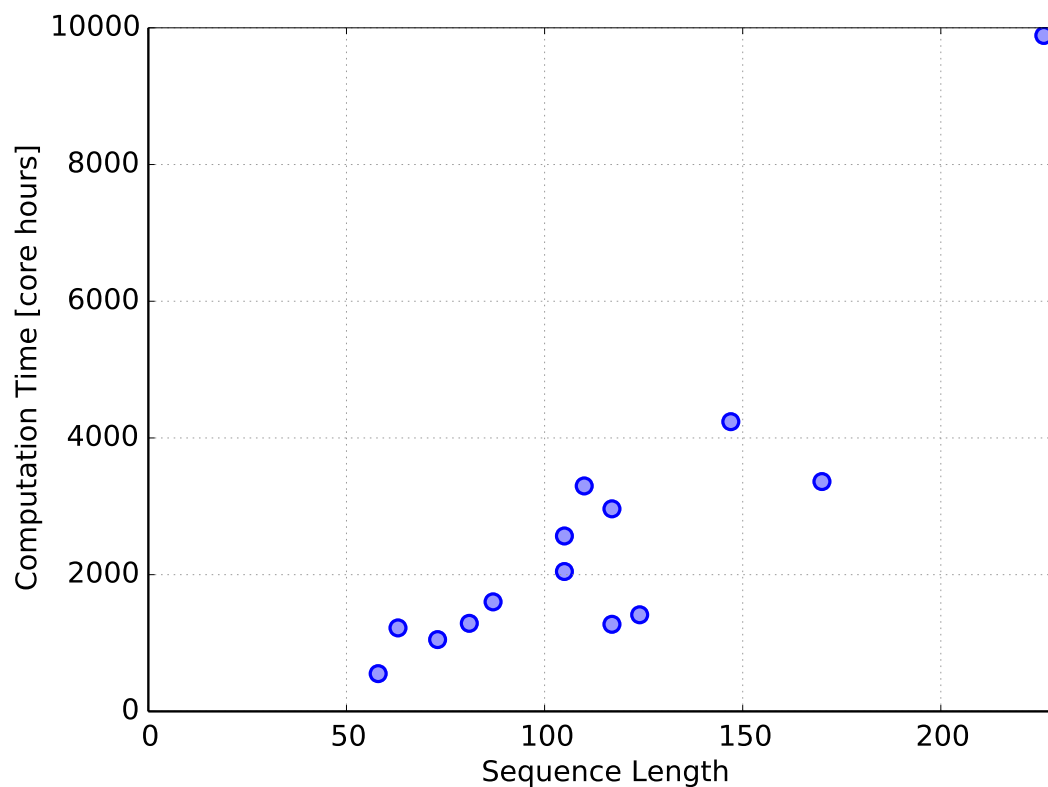

**Figure A: Computational expense for the initial RASREC run.** The computation time of the initial RASREC run for each of the targets of the EVFold benchmark set is plotted against the corresponding sequence length. The prediction has been carried out using a pool size of 500 on 2.6 GHz AMD Opteron processors. The computation time is dependent on several factors, including sequence length, fold complexity, and instructiveness of the restraints.

**Figure B: Lowest-Energy ReRASREC-PLM Structures**

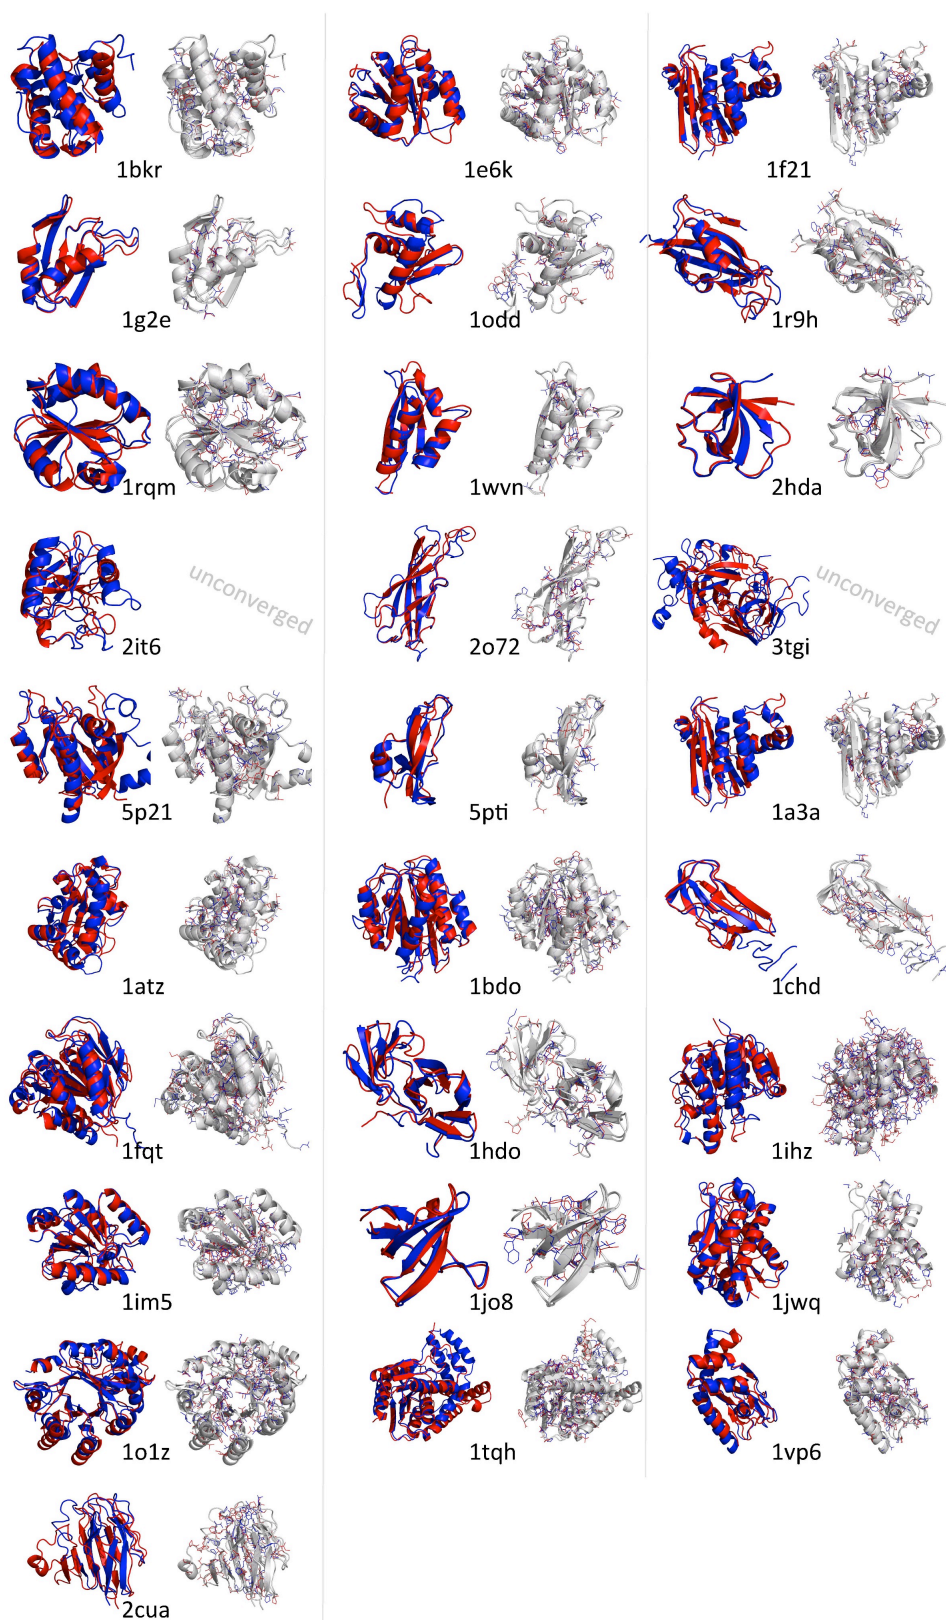

**Figure B: Lowest-Energy ReRASREC-PLM Structures.** The lowest-energy structures (red) are shown superimposed with the reference structure (blue). The same structures are shown with non-polar sidechains as lines in the right hand panel. If the RASREC calculation did not converge, the panel for sidechain details is omitted.

**Figure C: Comparison of ReRASREC-DI and EVFold-DI**

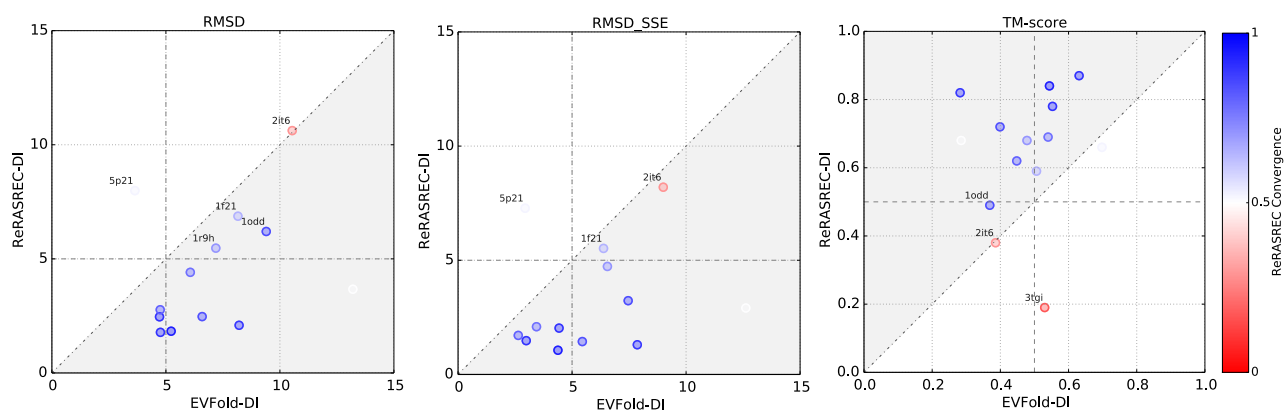

**Figure C: Comparison of ReRASREC-DI and EVFold-DI.** In case of ReRASREC-DI, the similarity measures are averaged over the 10 lowest-energy models, while for EVFold-DI the single top ranked model is evaluated. The color represents the fraction of converged residues in the 30 lowest-energy models of ReRASREC-DI. The gray areas indicate an improvement of ReRASREC-DI over EVFold-DI.

**Figure D: Comparison of top-ranked ReRASREC structures and lowest-RMSD EVFold models**

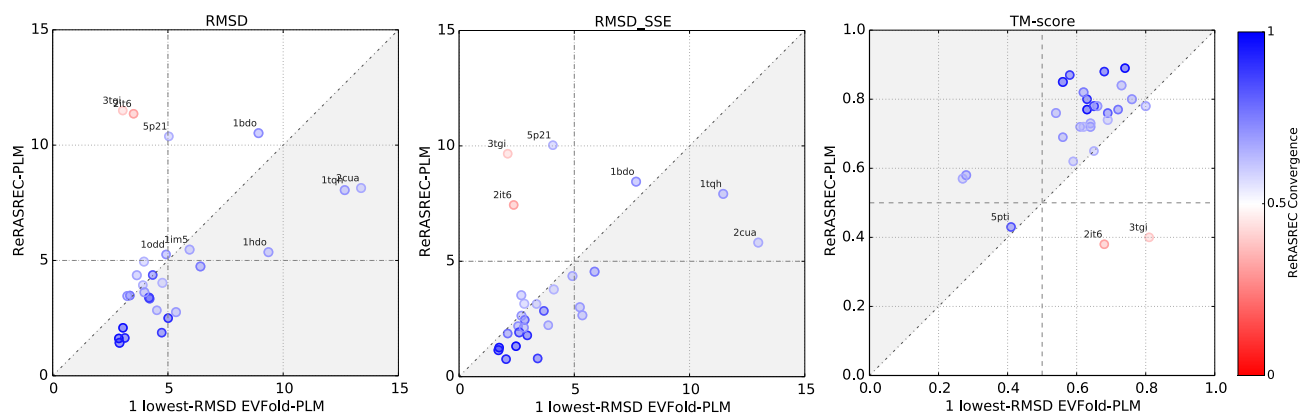

**Figure D: Comparison of top-ranked ReRASREC models and lowest RMSD EVFold models.** For each different metric, the single best performing EVFold structure (lowest RMSD) was selected among all 50 provided models and is compared to the average of this metric across the 10 lowest-energy models of a RASREC refinement run (ReRASREC-PLM)

**Figure E: Analysis of convergence and performance**

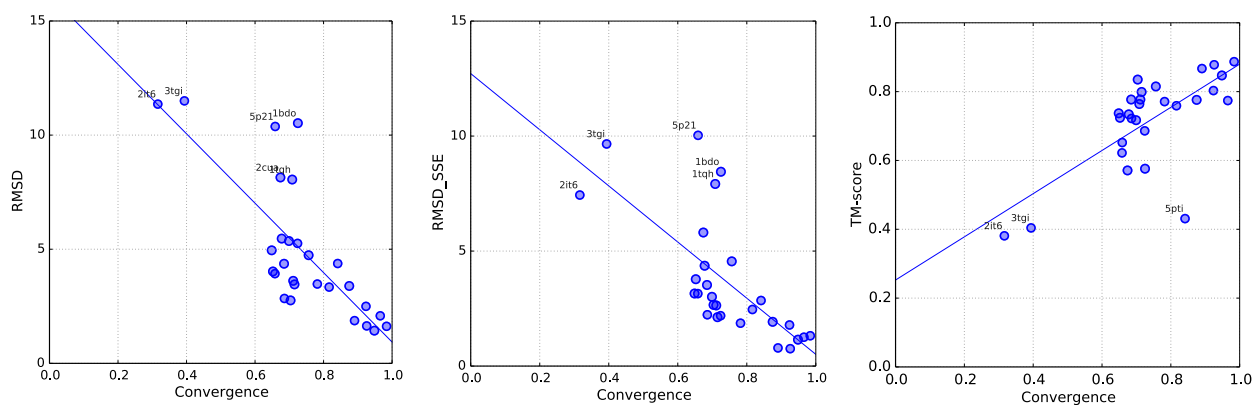

**Figure E: Analysis of prediction performance and convergence.** The different similarity measures (RMSD, RMSD\_SSE, and TM-score) averaged over the 10 lowest energy models are compared to the fraction of converged residues in the 30 lowest energy models.

**Figure F: Fraction of satisfied restraints in the native and top-ranked models**

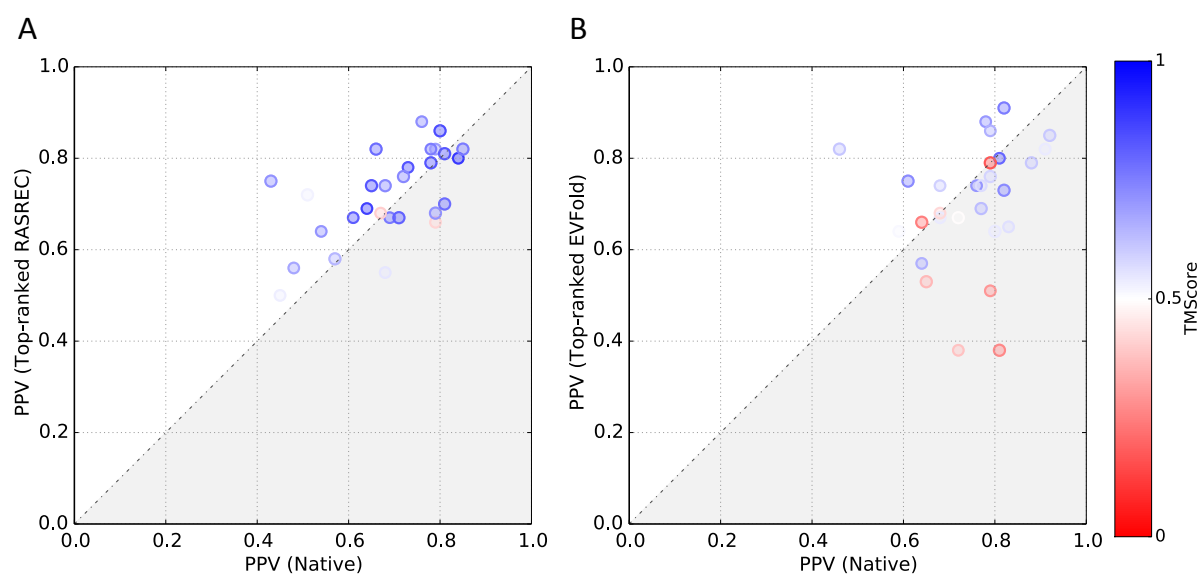

**Figure F: Fraction of satisfied restraints in native structures and top-ranked models.** PPVs were calculated for the restraint sets used for predicting the top-ranked models. Restraints were considered satisfied if the C $\beta$ -C $\beta$  distance is smaller or equal to 8Å. A) PPV values of restraints on top-ranked RASREC models (y-axis) and on the native structures (x-axis). For each target,  $L$  (=sequence length rounded down to the nearest multiple of 10) restraints were used. B) PPV values of C $\beta$ -C $\beta$  restraints on top-ranked EVFold models (y-axis) and on the native structures (x-axis). The restraints used for evaluation are the ones that have been used for generating the top-ranked EVFold model and the number therefore varies for each target between 10 and the sequence length.

## Supporting Tables

**Table A: TM-scores for EVFold, RASREC, PconsFold and FRAGFOLD**

| Benchmark set | Target | EVFold-PLM* | ReRASREC-PLM <sup>†</sup> | PconsFold (20k decoys) <sup>‡</sup> | FRAGFOLD <sup>§</sup> | Highest TM-score FRAGFOLD <sup>  </sup> | Lowest-RMSD ReRASREC-PLM <sup>¶</sup> |
|---------------|--------|-------------|---------------------------|-------------------------------------|-----------------------|-----------------------------------------|---------------------------------------|
| EVFold        | 1bkr   | 0.30        | 0.62                      | <b>0.74</b>                         | N/A                   | <0.76                                   | <0.69                                 |
|               | 1e6k   | 0.71        | <b>0.89</b>               | 0.82                                | N/A                   | <0.85                                   | <0.91                                 |
|               | 1f21   | 0.70        | <b>0.76</b>               | 0.61                                | N/A                   | <0.58                                   | <0.82                                 |
|               | 1g2e   | 0.56        | <b>0.88</b>               | 0.80                                | N/A                   | <0.80                                   | <0.91                                 |
|               | 1odd   | 0.51        | <b>0.69</b>               | 0.59                                | N/A                   | <0.62                                   | <0.76                                 |
|               | 1r9h   | 0.57        | <b>0.72</b>               | 0.65                                | N/A                   | <0.91                                   | <0.81                                 |
|               | 1rqm   | 0.54        | 0.80                      | <b>0.83</b>                         | N/A                   | <0.80                                   | <0.85                                 |
|               | 1wvn   | 0.54        | <b>0.87</b>               | 0.60                                | N/A                   | <0.70                                   | <0.89                                 |
|               | 2hda   | 0.42        | <b>0.77</b>               | 0.57                                | N/A                   | <0.85                                   | <0.87                                 |
|               | 2it6   | <b>0.66</b> | 0.38                      | 0.54                                | N/A                   | <0.45                                   | <0.42                                 |
|               | 2o72   | 0.65        | <b>0.77</b>               | 0.53                                | N/A                   | -                                       | <0.80                                 |
|               | 3tgi   | <b>0.80</b> | 0.40                      | 0.54                                | N/A                   | <0.51                                   | <0.42                                 |
|               | 5p21   | 0.59        | 0.65                      | <b>0.67</b>                         | N/A                   | <0.88                                   | <0.66                                 |
|               | 5pti   | 0.38        | 0.43                      | <b>0.57</b>                         | N/A                   | <0.57                                   | <0.55                                 |
|               | Mean   | 0.57        | <b>0.69</b>               | 0.65                                | N/A                   | <0.71                                   | <0.74                                 |
| Pconsfold     | 1a3a   | 0.61        | <b>0.74</b>               | N/A                                 | 0.56                  | N/A                                     | <0.77                                 |
|               | 1atz   | 0.73        | <b>0.84</b>               | N/A                                 | 0.64                  | N/A                                     | <0.88                                 |
|               | 1bdo   | 0.25        | <b>0.58</b>               | N/A                                 | 0.44                  | N/A                                     | <0.59                                 |
|               | 1chd   | 0.76        | <b>0.78</b>               | N/A                                 | 0.65                  | N/A                                     | <0.79                                 |
|               | 1fqt   | 0.61        | <b>0.78</b>               | N/A                                 | 0.7                   | N/A                                     | <0.88                                 |
|               | 1hdo   | 0.61        | <b>0.72</b>               | N/A                                 | 0.56                  | N/A                                     | <0.73                                 |
|               | 1ihz   | 0.63        | <b>0.78</b>               | N/A                                 | 0.62                  | N/A                                     | <0.81                                 |
|               | 1im5   | 0.59        | <b>0.73</b>               | N/A                                 | 0.56                  | N/A                                     | <0.78                                 |
|               | 1jo8   | 0.49        | <b>0.85</b>               | N/A                                 | 0.84                  | N/A                                     | <0.9                                  |
|               | 1jwq   | 0.73        | <b>0.80</b>               | N/A                                 | 0.31                  | N/A                                     | <0.84                                 |
|               | 1o1z   | 0.17        | <b>0.82</b>               | N/A                                 | 0.61                  | N/A                                     | <0.85                                 |
|               | 1tqh   | 0.54        | <b>0.76</b>               | N/A                                 | 0.5                   | N/A                                     | <0.77                                 |
|               | 1vp6   | 0.36        | <b>0.72</b>               | N/A                                 | 0.52                  | N/A                                     | <0.85                                 |
|               | 2cua   | 0.27        | <b>0.57</b>               | N/A                                 | 0.56                  | N/A                                     | <0.61                                 |
|               | Mean   | 0.52        | <b>0.75</b>               | N/A                                 | 0.58                  | N/A                                     | <0.79                                 |

**Table A: TM-scores for EVFold, RASREC, PconsFold and FRAGFOLD.** Column 1-4 show the top ranked results for methods EVFold-PLM, ReRASREC-PLM, PconsFold and FRAGFOLD. Column 5 furthermore shows the highest TM-scores obtained with FRAGFOLD and Column 6 the average TM-score of the ensemble of 10 lowest-RMSD models obtained with ReRASREC-PLM. The numbers in these two columns are preceded by '<' as they do not reflect the 'real' (best ranked) results, but the ones closest to the native and are therefore not comparable to the rest.

The highest TM-score for each target amongst the top-ranked results (Column 1-4) is highlighted.

\* Single top ranked results using the webserver of EVFold with PLM-restraints

<sup>†</sup> Ensemble of 10 lowest-energy models of ReRASREC using PLM-restraints

<sup>‡</sup> Top ranked models obtained with PconsFold. Restraints have been generated with PconsC. Values are taken from (Michel et al., 2014).

<sup>§</sup> Highest TM-score amongst top 5 ranked models using FRAGFOLD (using all contacts). Restraints have been generated with PSICOV. Values are taken from (Kosciolek & Jones, 2014).

<sup>||</sup> Highest TM-scores obtained with FRAGFOLD. Restraints have been generated with PSICOV. Values are taken from (Kosciolek & Jones, 2014).

<sup>¶</sup> Ensemble of 10 lowest-RMSD structures obtained with ReRASREC-PLM.



**Table B: Accuracy of side-chain  $\chi_1$  rotamers for EVFold-PLM and ReRASREC-PLM**

| Benchmark set           | Target | buried* | Recovered $\chi_1$ Rotamers |                                    |                            |                                    |                            |                                    |
|-------------------------|--------|---------|-----------------------------|------------------------------------|----------------------------|------------------------------------|----------------------------|------------------------------------|
|                         |        |         | ReRASREC-PLM                |                                    | EVFold-PLM                 |                                    | EVFold-PLM (relaxed)       |                                    |
|                         |        |         | Recovered $\chi_1^\dagger$  | Fraction of rec. $\chi_1^\ddagger$ | Recovered $\chi_1^\dagger$ | Fraction of rec. $\chi_1^\ddagger$ | Recovered $\chi_1^\dagger$ | Fraction of rec. $\chi_1^\ddagger$ |
| EVFold benchmark set    | 1bkr   | 42      | 28                          | 0.67                               | 14                         | 0.33                               | 16                         | 0.38                               |
|                         | 1e6k   | 49      | 39                          | 0.80                               | 27                         | 0.55                               | 25                         | 0.51                               |
|                         | 1f21   | 53      | 38                          | 0.72                               | 32                         | 0.60                               | 37                         | 0.70                               |
|                         | 1g2e   | 25      | 19                          | 0.76                               | 11                         | 0.44                               | 13                         | 0.52                               |
|                         | 1odd   | 27      | 19                          | 0.70                               | 13                         | 0.48                               | 13                         | 0.48                               |
|                         | 1r9h   | 36      | 28                          | 0.78                               | 12                         | 0.33                               | 16                         | 0.44                               |
|                         | 1rqm   | 42      | 25                          | 0.60                               | 22                         | 0.52                               | 21                         | 0.50                               |
|                         | 1wvn   | 19      | 14                          | 0.74                               | 6                          | 0.32                               | 7                          | 0.37                               |
|                         | 2hda   | 16      | 9                           | 0.56                               | 5                          | 0.31                               | 11                         | 0.69                               |
|                         | 2it6   | 48      | 24                          | 0.50                               | 21                         | 0.44                               | 26                         | 0.54                               |
|                         | 2o72   | 27      | 20                          | 0.74                               | 11                         | 0.41                               | 10                         | 0.37                               |
|                         | 3tgi   | 101     | 52                          | 0.51                               | 44                         | 0.44                               | 49                         | 0.49                               |
|                         | 5p21   | 71      | 45                          | 0.63                               | 31                         | 0.44                               | 38                         | 0.54                               |
|                         | 5pti   | 14      | 5                           | 0.36                               | 8                          | 0.57                               | 8                          | 0.57                               |
| Pconsfold benchmark set | 1a3a   | 56      | 37                          | 0.66                               | 23                         | 0.41                               | 27                         | 0.48                               |
|                         | 1atz   | 72      | 47                          | 0.65                               | 29                         | 0.40                               | 34                         | 0.47                               |
|                         | 1bdo   | 25      | 15                          | 0.60                               | 8                          | 0.32                               | 11                         | 0.44                               |
|                         | 1chd   | 74      | 50                          | 0.68                               | 32                         | 0.43                               | 37                         | 0.50                               |
|                         | 1fqt   | 44      | 32                          | 0.73                               | 16                         | 0.36                               | 21                         | 0.48                               |
|                         | 1hdo   | 84      | 46                          | 0.55                               | 30                         | 0.36                               | 38                         | 0.45                               |
|                         | 1ihz   | 51      | 35                          | 0.69                               | 26                         | 0.51                               | 25                         | 0.49                               |
|                         | 1im5   | 68      | 40                          | 0.59                               | 27                         | 0.40                               | 32                         | 0.47                               |
|                         | 1jo8   | 15      | 11                          | 0.73                               | 4                          | 0.27                               | 6                          | 0.40                               |
|                         | 1jwq   | 76      | 47                          | 0.62                               | 30                         | 0.39                               | 40                         | 0.53                               |
|                         | 1o1z   | 99      | 70                          | 0.71                               | 34                         | 0.34                               | 58                         | 0.59                               |
|                         | 1tqh   | 106     | 79                          | 0.75                               | 43                         | 0.41                               | 50                         | 0.47                               |
|                         | 1vp6   | 50      | 39                          | 0.78                               | 25                         | 0.50                               | 27                         | 0.54                               |
|                         | 2cua   | 46      | 25                          | 0.54                               | 15                         | 0.33                               | 20                         | 0.43                               |
| Average                 | N/A    | N/A     | 33.5                        | 0.65                               | 21.4                       | 0.41                               | 25.6                       | 0.49                               |

**Table B: Accuracy of side-chain  $\chi_1$  rotamers.** Buried side chains in single top-ranked models are selected and their adopted rotamer assignments are compared to those in the reference crystal structure. In case of EVFold, the analysis has been carried out for the models as generated by CNS (EVFold-PLM) and after relaxing them with fixed backbone atoms within the Rosetta full-atom energy (EVFold-PLM (relaxed)). Glycine and Alanine are excluded from this analysis.

\* Side chains that are buried in the reference structure ( $\text{SASA} < 40\text{\AA}^2$ )

<sup>†</sup> Side chains that are buried in the reference structure and have the same  $\chi_1$  rotamer assignment in the top-ranked models as in the reference structure

<sup>‡</sup> Fraction of buried side chains with the the same  $\chi_1$  rotamer assignment in the top-ranked models and the reference structure

**Table C: Comparison between top ranked and lowest-RMSD structures**

| Bench-<br>mark<br>set                   | Target | RMSD                |                      |                    |                     |                     |                      |                    |                     | TM-score            |                      |                    |                     |                     |                      |                    |                     |
|-----------------------------------------|--------|---------------------|----------------------|--------------------|---------------------|---------------------|----------------------|--------------------|---------------------|---------------------|----------------------|--------------------|---------------------|---------------------|----------------------|--------------------|---------------------|
|                                         |        | ReRASREC-PLM        |                      |                    |                     | EVFold-PLM          |                      |                    |                     | ReRASREC-PLM        |                      |                    |                     | EVFold-PLM          |                      |                    |                     |
|                                         |        | top 10 <sup>*</sup> | best 10 <sup>†</sup> | top 1 <sup>‡</sup> | best 1 <sup>§</sup> | top 10 <sup>*</sup> | best 10 <sup>†</sup> | top 1 <sup>‡</sup> | best 1 <sup>§</sup> | top 10 <sup>*</sup> | best 10 <sup>†</sup> | top 1 <sup>‡</sup> | best 1 <sup>§</sup> | top 10 <sup>*</sup> | best 10 <sup>†</sup> | top 1 <sup>‡</sup> | best 1 <sup>§</sup> |
| EVFold<br>bench-<br>mark<br>set         | 1bkr   | 3.93                | 3.06                 | 4.11               | 2.93                | 9.52                | 4.77                 | 13.79              | 3.91                | 0.62                | 0.69                 | 0.60               | 0.72                | 0.41                | 0.54                 | 0.30               | 0.59                |
|                                         | 1e6k   | 1.62                | 1.37                 | 1.57               | 1.27                | 3.44                | 3.10                 | 3.34               | 2.87                | 0.89                | 0.92                 | 0.90               | 0.93                | 0.70                | 0.72                 | 0.71               | 0.74                |
|                                         | 1f21   | 3.34                | 2.63                 | 2.87               | 2.56                | 4.84                | 4.40                 | 4.21               | 4.21                | 0.76                | 0.82                 | 0.81               | 0.83                | 0.65                | 0.67                 | 0.70               | 0.69                |
|                                         | 1g2e   | 1.64                | 1.09                 | 1.48               | 0.82                | 3.83                | 3.39                 | 4.23               | 3.13                | 0.88                | 0.92                 | 0.89               | 0.94                | 0.59                | 0.65                 | 0.56               | 0.68                |
|                                         | 1odd   | 5.26                | 3.27                 | 5.46               | 2.93                | 6.15                | 5.28                 | 6.14               | 4.92                | 0.69                | 0.76                 | 0.67               | 0.79                | 0.50                | 0.53                 | 0.51               | 0.56                |
|                                         | 1r9h   | 2.84                | 2.05                 | 2.51               | 1.85                | 5.93                | 4.86                 | 4.87               | 4.52                | 0.72                | 0.82                 | 0.76               | 0.84                | 0.52                | 0.56                 | 0.57               | 0.61                |
|                                         | 1rqm   | 2.50                | 1.77                 | 2.26               | 1.63                | 7.23                | 5.73                 | 5.91               | 5.01                | 0.80                | 0.86                 | 0.82               | 0.86                | 0.52                | 0.57                 | 0.54               | 0.63                |
|                                         | 1wvn   | 1.87                | 1.35                 | 2.01               | 1.29                | 5.83                | 5.26                 | 5.87               | 4.73                | 0.87                | 0.89                 | 0.85               | 0.90                | 0.51                | 0.52                 | 0.54               | 0.58                |
|                                         | 2hda   | 2.08                | 1.36                 | 2.03               | 1.30                | 4.64                | 3.60                 | 4.91               | 3.05                | 0.77                | 0.87                 | 0.84               | 0.89                | 0.49                | 0.53                 | 0.42               | 0.63                |
|                                         | 2it6*  | 11.36               | 9.54                 | 11.74              | 9.17                | 4.31                | 3.72                 | 3.94               | 3.51                | 0.38                | 0.42                 | 0.37               | 0.45                | 0.60                | 0.66                 | 0.66               | 0.68                |
|                                         | 2o72   | 3.48                | 2.84                 | 2.86               | 2.62                | 4.13                | 3.95                 | 4.14               | 3.35                | 0.77                | 0.80                 | 0.82               | 0.82                | 0.66                | 0.67                 | 0.65               | 0.72                |
|                                         | 3tgi*  | 11.50               | 10.04                | 11.17              | 9.75                | 3.53                | 3.19                 | 3.12               | 3.04                | 0.40                | 0.42                 | 0.40               | 0.43                | 0.77                | 0.80                 | 0.80               | 0.81                |
|                                         | 5p21   | 10.38               | 8.78                 | 10.70              | 7.88                | 7.04                | 5.50                 | 6.58               | 5.04                | 0.65                | 0.66                 | 0.65               | 0.67                | 0.57                | 0.61                 | 0.59               | 0.65                |
|                                         | 5pti   | 4.37                | 3.27                 | 4.69               | 2.92                | 8.65                | 4.93                 | 5.82               | 4.34                | 0.43                | 0.55                 | 0.43               | 0.60                | 0.27                | 0.37                 | 0.38               | 0.41                |
| Pcons-<br>Fold<br>bench-<br>mark<br>set | 1a3a   | 4.95                | 3.47                 | 3.38               | 2.62                | 5.30                | 4.37                 | 5.28               | 3.96                | 0.74                | 0.77                 | 0.78               | 0.83                | 0.64                | 0.68                 | 0.61               | 0.69                |
|                                         | 1atz   | 2.76                | 2.21                 | 2.44               | 2.15                | 9.93                | 6.52                 | 5.35               | 5.21                | 0.84                | 0.89                 | 0.87               | 0.89                | 0.61                | 0.71                 | 0.73               | 0.73                |
|                                         | 1bdo   | 10.52               | 8.17                 | 11.73              | 7.54                | 17.67               | 10.66                | 11.39              | 8.93                | 0.58                | 0.59                 | 0.56               | 0.58                | 0.25                | 0.25                 | 0.25               | 0.28                |
|                                         | 1chd   | 4.36                | 3.98                 | 4.31               | 3.78                | 4.22                | 3.97                 | 4.10               | 3.65                | 0.78                | 0.79                 | 0.78               | 0.81                | 0.77                | 0.79                 | 0.76               | 0.80                |
|                                         | 1fqt   | 3.39                | 1.70                 | 2.24               | 1.53                | 4.88                | 4.76                 | 5.36               | 4.18                | 0.78                | 0.88                 | 0.82               | 0.89                | 0.61                | 0.61                 | 0.61               | 0.65                |
|                                         | 1hdo   | 5.36                | 4.79                 | 5.57               | 4.74                | 10.53               | 9.49                 | 9.46               | 9.36                | 0.72                | 0.73                 | 0.71               | 0.73                | 0.58                | 0.61                 | 0.61               | 0.64                |
|                                         | 1ihz   | 3.62                | 2.68                 | 3.90               | 2.46                | 5.00                | 4.49                 | 4.46               | 3.98                | 0.78                | 0.81                 | 0.76               | 0.81                | 0.61                | 0.63                 | 0.63               | 0.66                |
|                                         | 1im5   | 5.47                | 3.93                 | 5.69               | 3.59                | 8.03                | 6.54                 | 7.30               | 5.94                | 0.73                | 0.78                 | 0.70               | 0.81                | 0.58                | 0.62                 | 0.59               | 0.64                |
|                                         | 1jo8   | 1.43                | 0.95                 | 1.54               | 0.84                | 4.55                | 3.19                 | 3.56               | 2.90                | 0.85                | 0.90                 | 0.85               | 0.91                | 0.47                | 0.54                 | 0.49               | 0.56                |
|                                         | 1jwq   | 3.46                | 2.86                 | 3.50               | 2.71                | 3.54                | 3.41                 | 3.57               | 3.24                | 0.80                | 0.84                 | 0.79               | 0.85                | 0.73                | 0.74                 | 0.73               | 0.76                |
|                                         | 1o1z   | 4.74                | 4.24                 | 4.95               | 4.21                | 15.25               | 8.69                 | 25.41              | 6.41                | 0.82                | 0.85                 | 0.80               | 0.84                | 0.39                | 0.55                 | 0.17               | 0.62                |
|                                         | 1tqh   | 8.05                | 5.20                 | 7.98               | 4.33                | 15.82               | 13.44                | 12.67              | 12.67               | 0.76                | 0.78                 | 0.78               | 0.79                | 0.48                | 0.53                 | 0.54               | 0.54                |
|                                         | 1vp6   | 4.03                | 2.03                 | 2.75               | 1.93                | 12.58               | 9.04                 | 10.95              | 4.76                | 0.72                | 0.85                 | 0.82               | 0.86                | 0.35                | 0.44                 | 0.36               | 0.62                |
|                                         | 2cua   | 8.14                | 7.10                 | 8.32               | 6.99                | 19.94               | 18.27                | 19.22              | 14.18               | 0.57                | 0.61                 | 0.57               | 0.61                | 0.29                | 0.30                 | 0.27               | 0.27                |
| Average                                 |        | 4.87                | 3.78                 | 4.78               | 3.51                | 7.72                | 6.02                 | 7.32               | 5.18                | 0.72                | 0.77                 | 0.73               | 0.78                | 0.54                | 0.59                 | 0.55               | 0.62                |

**Table C: Comparison between top ranked and lowest-RMSD structures.**

\* ensemble of 10 lowest-energy (ReRASREC-PLM)/ best ranked (EVFold-PLM) models

† ensemble of 10 lowest-RMSD models

‡ single lowest-energy (ReRASREC-PLM)/ best ranked (EVFold-PLM) models

§ single lowest-RMSD models

**Table D: Restraint classification performance of RASREC**

| Benchmark Set    | Target | #Restrains | TP  | FP | TN | FN | TPR=<br>TP/(TP+FN) | TNR=<br>TN/(TN+FP) | PPV=<br>TP/(TP+FP) | NPV=<br>TN/(TN+FN) | ACC=<br>(TP+TN)/(P+N) |
|------------------|--------|------------|-----|----|----|----|--------------------|--------------------|--------------------|--------------------|-----------------------|
| <b>EVFold</b>    |        |            |     |    |    |    |                    |                    |                    |                    |                       |
| Benchmark Set    | 1bkr   | 110        | 40  | 15 | 45 | 10 | 0.80               | 0.75               | 0.73               | 0.82               | 0.77                  |
|                  | 1e6k   | 120        | 81  | 12 | 20 | 7  | 0.92               | 0.63               | 0.87               | 0.74               | 0.84                  |
|                  | 1f21   | 140        | 79  | 15 | 28 | 18 | 0.81               | 0.65               | 0.84               | 0.61               | 0.76                  |
|                  | 1g2e   | 80         | 63  | 1  | 12 | 4  | 0.94               | 0.92               | 0.98               | 0.75               | 0.94                  |
|                  | 1odd   | 80         | 38  | 13 | 24 | 5  | 0.88               | 0.65               | 0.75               | 0.83               | 0.78                  |
|                  | 1r9h   | 100        | 70  | 12 | 9  | 9  | 0.89               | 0.43               | 0.85               | 0.50               | 0.79                  |
|                  | 1rqm   | 100        | 55  | 12 | 27 | 6  | 0.90               | 0.69               | 0.82               | 0.82               | 0.82                  |
|                  | 1wvn   | 70         | 45  | 3  | 22 | 0  | 1.00               | 0.88               | 0.94               | 1.00               | 0.96                  |
|                  | 2hda   | 50         | 36  | 5  | 6  | 3  | 0.92               | 0.55               | 0.88               | 0.67               | 0.84                  |
|                  | 2it6   | 110        | 50  | 11 | 24 | 25 | 0.67               | 0.69               | 0.82               | 0.49               | 0.67                  |
|                  | 2o72   | 110        | 80  | 17 | 9  | 4  | 0.95               | 0.35               | 0.82               | 0.69               | 0.81                  |
|                  | 3tgi   | 220        | 125 | 21 | 25 | 49 | 0.72               | 0.54               | 0.86               | 0.34               | 0.68                  |
|                  | 5p21   | 170        | 73  | 23 | 66 | 8  | 0.90               | 0.74               | 0.76               | 0.89               | 0.82                  |
|                  | 5pti   | 60         | 30  | 11 | 9  | 10 | 0.75               | 0.45               | 0.73               | 0.47               | 0.65                  |
| <b>Pconsfold</b> |        |            |     |    |    |    |                    |                    |                    |                    |                       |
| Benchmark Set    | 1a3a   | 140        | 87  | 8  | 22 | 23 | 0.79               | 0.73               | 0.92               | 0.49               | 0.78                  |
|                  | 1atz   | 180        | 134 | 12 | 22 | 12 | 0.92               | 0.65               | 0.92               | 0.65               | 0.87                  |
|                  | 1bdo   | 80         | 38  | 20 | 19 | 3  | 0.93               | 0.49               | 0.66               | 0.86               | 0.71                  |
|                  | 1chd   | 200        | 131 | 9  | 30 | 30 | 0.81               | 0.77               | 0.94               | 0.50               | 0.81                  |
|                  | 1fmt   | 110        | 84  | 6  | 10 | 10 | 0.89               | 0.63               | 0.93               | 0.50               | 0.85                  |
|                  | 1hdo   | 200        | 78  | 72 | 41 | 9  | 0.90               | 0.36               | 0.52               | 0.82               | 0.60                  |
|                  | 1ihz   | 140        | 99  | 11 | 20 | 10 | 0.91               | 0.65               | 0.90               | 0.67               | 0.85                  |
|                  | 1im5   | 180        | 116 | 20 | 30 | 14 | 0.89               | 0.60               | 0.85               | 0.68               | 0.81                  |
|                  | 1jo8   | 50         | 40  | 3  | 7  | 0  | 1.00               | 0.70               | 0.93               | 1.00               | 0.94                  |
|                  | 1jwq   | 170        | 100 | 26 | 33 | 11 | 0.90               | 0.56               | 0.79               | 0.75               | 0.78                  |
|                  | 1o1z   | 230        | 138 | 16 | 51 | 25 | 0.85               | 0.76               | 0.90               | 0.67               | 0.82                  |
|                  | 1tqh   | 240        | 149 | 29 | 48 | 14 | 0.91               | 0.62               | 0.84               | 0.77               | 0.82                  |
|                  | 1vp6   | 130        | 85  | 21 | 23 | 1  | 0.99               | 0.52               | 0.80               | 0.96               | 0.83                  |
|                  | 2cua   | 130        | 63  | 12 | 44 | 11 | 0.85               | 0.79               | 0.84               | 0.80               | 0.82                  |
| Average          | -      | -          | -   | -  | -  | -  | 0.88               | 0.63               | 0.84               | 0.70               | 0.80                  |

**Table D: Restraint classification performance of RASREC.** Evaluation is carried out for the single top-ranked RASREC models. Restraint sets are the ones used for model generation. A restraint is defined as correct (P) if the C $\beta$ -C $\beta$  distance in the native structure is  $\leq 8\text{\AA}$ , otherwise as incorrect (N).

TP: Restraints satisfied in both model and native structure

FP: Restraints satisfied in model, but not in the native structure

TN: Restraints neither satisfied in model nor native structure

FN: Restraints satisfied in native structure, but not in model

## Supporting Methods

Detailed instructions about how to recreate and analyze the results presented in the manuscript can be found in the protocol capture (provided as File S2 and in the current Rosetta release). The protocol capture contains all necessary flag files, command lines and scripts.

### Method A: Contact Prediction and Restraint File Generation

The contact predictions used in this manuscript have been generated with the EVFold webserver (Marks et al., 2011) (available at <http://evfold.org/evfold-web/newprediction.do>) using standard parameters. The results can be downloaded in form of a compressed folder, which is subdivided into several subdirectories. The all-by-all residue pairing scores are stored in `{jobname}_{scoringmethod}.txt` in the subfolder `ev_couplings`. In case of PLM as scoring method, the file is named `{jobname}_PLM.txt`.

From this file, the  $L$  top-ranked residue pairing scores having a minimum distance of 5 residues are extracted and translated into Rosetta specific distance restraints with a sigmoidal potential.

Exemplary excerpt from the generated distance restraint file:

```
AtomPair  CA   97   CB  117  SIGMOID 8.00 1.00 #ContactMap: 0.82
AtomPair  CB   18   CB   47  SIGMOID 8.00 1.00 #ContactMap: 0.78
AtomPair  CB   89   CB  113  SIGMOID 8.00 1.00 #ContactMap: 0.77
```

### Method B: Structure Prediction with the RASREC protocol

#### Fragment Selection

We have run the fragment picker for all targets with the following command:  
`make_fragments.pl -nohoms`

The flag `-nohoms` leads to exclusion of fragments from homologous proteins. This flag should be omitted when not used for benchmarking.

#### Starting a RASREC run

The structures are generated with the RASREC protocol (Lange & Baker, 2012) of the molecular modeling suite Rosetta (using commit #aa72710 from March 2014) with a pool size of 500. A detailed list of all commands used for a RASREC calculation can be found below.

```
mpiexec -np <CORES> minirosetta.mpi.linuxgccrelease -out:file:silent decoys.out
@flags_denovo @flags_rasrec @flags_iterative -run:archive -out:nstruct <CORES-
3>
```

## Flag Files, Patches and Broker File

Command-line flags and patches are separated into a number of different files. All parameters used to generate the data in our manuscript are listed below.

For executing RASREC, bold elements need to be replaced with actual input files.

### flags\_denovo

```
-run:protocol broker

#fragment files
-frag3 <frags.3mers>
-frag9 <frags.9mers>
#input fasta sequence
-in:file:fasta <sequence.fasta>

-out:file:silent_print_all_score_headers
-increase_cycles 2.000000

#jumping
-templates::topology_rank_cutoff 0.8
-jumps:ramp_chainbreaks
-jumps:sep_switch_accelerate 0.8
-abinitio:skip_convergence_check
-jumps:overlap_chainbreak

#energy fixes
-rsd_wt_helix 0.5
-rsd_wt_loop 0.5
-rg_reweight 0.5

#for loop closing
-overwrite_filter_scorefn score3
-detect_disulf false

#loop-closing filter in SlidingWindow
-fast_loops:overwrite_filter_scorefn score3

-abrelax:fail_unclosed

#specify logfile output level
-unmute memory_usage
-out:levels core.chemical:error
-out:levels core.io.pdb:error
-out:levels protocols.jobdist:error

#load flags in flags_nmr_patches
@flags_nmr_patches
```

### flags\_fullatom

```
-relax:fast
-relax:ramady
-abinitio:close_loops
-loops:idealize_before_loop_close
-loops:idealize_after_loop_close
-abinitio::clear_pose_cache
-short_frag_cycles 1
-scored_frag_cycles 1
```

```

-non_ideal_loop_closing
-alternative_closure_protocol
-fast_loops>window_accept_ratio .01
-fast_loops:nr_scored_sampling_passes 4
-fast_loops:min_breakout_good_loops 5
-fast_loops:min_breakout_fast_loops 80
-fast_loops:min_fast_loops 3
-fast_loops:min_good_loops 0
-fast_loops:nr_scored_fragments 20
-fast_loops:vdw_delta 0.5
-fast_loops:give_up 1000

```

### flags\_iterative

```

-iterative:enumerate:skip_half
#RASREC pool size
-iterative:pool_size 500
#Acceptance ratio for different RASREC stages
-iterative:accept_ratio 0.1 0.1 0.1 0.1 0.1 0.1 0.1 0.1
-jumps::max_strand_gap_allowed 10
-jumps:contact_score 0.2
-iterative:rmsf_nstruct 50
#Output levels for log file
-out:level 400
-out:levels all:warning
-out:levels protocols.jd2.MPIArchiveJobDistributor:info
-out:levels protocols.jd2.Archive:debug
-out:levels protocols.iterative:info
-out:levels core.util.prof:info

```

### #obsolete

```

-iterative:evaluate_only_on_slaves

```

### #scoring functions for fullatom and centroid stages

```

-iterative:fa_score talaris2013
-iterative:cen_score score3

```

### #Stages:

```

# (1) SS-RANDOM
# (2) MIX
# (3) BETA-TOP
# (4) RESAM
# (5) NOE-BETA-TOP
# (6) NOE-RESAM
# (7) CEN2FULL
# (8) FULL-REFINE

```

```

-iterative:max_nstruct 0 0 0 0 -1 -1 0 0
-iterative:min_diversity 0 0 0 2.0 3.0 2.0 2.0 1.5
-iterative:fullatom

```

```

-iterative:safety_hatch_scorecut 0.1
-iterative::super_quick_relax_patch super_quick_relax.patch

```

```

#this is the relative weight the noesy-cst will have for filtering
#the relative weight provided in the following is multiplied with the overall
#weight for atom_pair_constraint in the patches
#given by -iterative:cen_score_patch and -iterative:fa_score_patch
-iterative:cenpool_noesy_cst_weight 1
-iterative:fapool_noesy_cst_weight 1

```

```

#exit as soon as queue is drained

```

```

-jd2:mpi_nowait_for_remaining_jobs
-jd2:mpi_timeout_factor 0

-iterative:flags_fullatom flags_fullatom

#important to obtain intermediate structures for proto-fold resampling (aka
stage2 resampling)
-abinitio:debug
-abinitio:debug_structures

-archive:completion_notify_frequency 125

flags_rasrec

#File containing information about distance restraints
-broker:setup setup_init.tpb

#Only needed for evaluation purposes (in case native structure is known)
-in:file:native <native.pdb>
-evaluation:rmsd NATIVE _full <native.rigid>


flags_nmr_patches

#patches used for abinitio stages
-abinitio::stage2_patch nmr_patch
-abinitio::stage3a_patch nmr_patch
-abinitio::stage3b_patch nmr_patch
-abinitio::stage4_patch nmr_patch

#for fullatom-relax
-score::patch nmr_relax_patch

# for loop closing
-fast_loops:patch_filter_scorefxn nmr_patch
-patch_filter_scorefxn nmr_patch

-iterative:fa_score_patch nmr_pool_patch
-iterative:cen_score_patch nmr_pool_patch


nmr_patch
atom_pair_constraint = 5.0
rdc = 5.0

nmr_pool_patch
chainbreak = 1
linear_chainbreak = 1.33
overlap_chainbreak = 1
atom_pair_constraint = 10
rdc = 10

nmr_relax_patch
atom_pair_constraint = 0.1
rdc = 0.1

setup_init.tpb

CLAIMER ConstraintClaimer
file <restraints.cst>
FULLATOM

```

```

CENTROID
SKIP_REDUNDANT 0
FILTER_WEIGHT 1.00
FILTER_NAME restraints_SIGMOID
END_CLAIMER

```

## Method C: Refinement with Rasrec

If the convergence of the initial RASREC run was not sufficiently high (fraction of converged residues < 90%), a second RASREC run was carried out. This run reuses restraints from both predicted contact map and the previous results.

### Repick Restraints

The refinement run uses restraints from both predicted contact map and the previous results. For this purpose, two different restraint files have been generated:

#### **target\_converged\_distances.cst**

This restraint file contains all short-range ( $\leq 8$  Å) distances with a standard deviation < 1 Å in the 30 lowest-energy RASREC models. These converged distances will be enforced during ReRASREC using a strict bounded potential. To reflect the average distance  $d$  in the converged region, the lower bound is set to  $(d-1)$  and the upper bound to  $(d+1)$ .

#### **target\_filtered\_contactmaps.cst**

This file contains additional residue-residue pairings from the predicted contact map that affect unconverged regions (residue-residue distance, SD > 1 Å in 30 low-energy structures) and do not totally disagree (i.e. are short range with an average distance  $d \leq 8$  Å) with the preliminary structures. The restraints are scored with a wide bounded potential with lower bound and upper bound set to 1.5 Å and 8 Å respectively. Random pairs of these restraints are combined into ambiguous restraints (see below).

### Setup RASREC run

The flags and patches used for the refinement RASREC run are identical to the ones listed in Method B: Structure Prediction with the RASREC protocol. The two RASREC runs only differ in the restraints used for structural guiding. The restraint files are added to a RASREC run in the broker file `setup_init.tpb`.

Both restraint files that have been generated above will be added to the broker file for the refinement run as follows

```

CLAIMER ConstraintClaimer
file target_converged_distances.cst
FULLATOM
CENTROID
SKIP_REDUNDANT 0
FILTER_WEIGHT 1.00
FILTER_NAME converged_distances
END_CLAIMERs

```



```
CLAIMER ConstraintClaimer
file target_filtered_contactmaps.cst
FULLATOM
CENTROID
COMBINE_RATIO 2    #make the restrints ambiguous
SKIP_REDUNDANT 0
FILTER_WEIGHT 1.00
FILTER_NAME filtered_contactmaps
END_CLAIMER
```

Please note, that for the filtered\_contactmap.cst restraints the following line is added:

```
COMBINE_RATIO 2
```

This line transforms the restraints to ambiguous ones.

## References

1. Michel M, Hayat S, Skwark MJ, Sander C, Marks DS, Elofsson A (2014) PconsFold: improved contact predictions improve protein models. *Bioinformatics* 30: i482-8.
2. Kosciolk T, Jones DT (2014) De novo structure prediction of globular proteins aided by sequence variation-derived contacts. *PLoS One* 9: e92197.
3. Marks DS, Colwell LJ, Sheridan R, Hopf TA, Pagnani A, Zecchina R, et al. (2011) Protein 3D structure computed from evolutionary sequence variation. *PLoS One* 6: e28766.
4. Lange OF, Baker D (2012) Resolution-adapted recombination of structural features significantly improves sampling in restraint-guided structure calculation. *Proteins* 80: 884-95.
